# Supplementary material for: Trends in Adiposity and Food Insecurity Among US Adults
Source: PubMed Central journal article supplement (PMC7414390; doi:10.1001/jamanetworkopen.2020.12767), 2020-08-07
Supplement: jamanetwopen-3-e2012767-s001.pdf [file jamanetwopen-3-e2012767-s001.pdf]

## Supplementary Online Content

Myers CA, Mire EF, Katzmarzyk PT. Trends in adiposity and food insecurity among US adults. *JAMA Netw Open*. 2020;3(8):e2012767.  
doi:10.1001/jamanetworkopen.2020.12767

**eTable 1.** Weighted Sample Characteristics by Food Security Status Among Adults in the US, NHANES 2015-2016

**eFigure 1.** Crude Weighted Trends in Waist Circumference by Sex and Race/Ethnicity, NHANES 1999-2016

**eTable 2.** Crude Weighted Trends in Food Insecurity by Sex and Adiposity Among the US Adult Population, NHANES 1999-2016

**eTable 3.** Crude Weighted Trends in Food Insecurity by Race/Ethnicity and Adiposity Among the US Adult Population, NHANES 1999-2016

**eFigure 2.** Adjusted Odds (95% CI) of Food Insecurity Among Adults in the US, NHANES 1999-2016

This supplementary material has been provided by the authors to give readers additional information about their work.

| <b>eTable 1. Weighted Sample Characteristics by Food Security Status Among Adults in the US, NHANES 2015-2016<sup>a</sup></b> |                    |                      |                                   |
|-------------------------------------------------------------------------------------------------------------------------------|--------------------|----------------------|-----------------------------------|
|                                                                                                                               | <b>Food Secure</b> | <b>Food Insecure</b> | <b><i>p</i>-value<sup>c</sup></b> |
| Unweighted sample                                                                                                             | 3,978              | 1,331                |                                   |
| Weighted sample <sup>b</sup>                                                                                                  | 186,788,670        | 41,645,622           |                                   |
| Body mass index (BMI)                                                                                                         |                    |                      | <0.001                            |
| <25 kg/m <sup>2</sup>                                                                                                         | 29.3 (26.0-32.7)   | 23.4 (18.5-28.4)     |                                   |
| 25 to 29.9 kg/m <sup>2</sup>                                                                                                  | 32.7 (31.1-34.3)   | 27.0 (23.2-30.9)     |                                   |
| ≥30 kg/m <sup>2</sup>                                                                                                         | 37.9 (34.3-41.5)   | 49.5 (45.2-53.9)     |                                   |
| Waist circumference (WC)                                                                                                      |                    |                      | 0.006                             |
| Less than High-Risk                                                                                                           | 44.5 (39.8-49.1)   | 38.5 (34.1-42.8)     |                                   |
| High-Risk                                                                                                                     | 55.5 (50.9-60.2)   | 61.5 (57.2-65.9)     |                                   |
| Sex                                                                                                                           |                    |                      | 0.006                             |
| Female                                                                                                                        | 51.5 (50.0-53.1)   | 54.9 (52.6-57.2)     |                                   |
| Male                                                                                                                          | 48.5 (46.9-50.0)   | 45.1 (42.8-47.4)     |                                   |
| Race/ethnicity                                                                                                                |                    |                      | <0.001                            |
| Non-Hispanic White                                                                                                            | 68.3 (60.4-76.3)   | 45.9 (35.5-56.3)     |                                   |
| Non-Hispanic African American                                                                                                 | 9.9 (5.5-14.2)     | 18.2 (11.3-25.0)     |                                   |
| Hispanic                                                                                                                      | 11.9 (6.9-16.9)    | 28.7 (21.0-36.5)     |                                   |
| Other                                                                                                                         | 9.9 (6.9-12.9)     | 7.2 (4.8-9.5)        |                                   |
| Age                                                                                                                           |                    |                      | <0.001                            |
| 20-39                                                                                                                         | 34.0 (31.0-37.0)   | 44.7 (40.2-49.1)     |                                   |
| 40-64                                                                                                                         | 43.9 (41.5-46.4)   | 42.6 (39.9-45.3)     |                                   |
| 65 and older                                                                                                                  | 22.0 (19.3-24.8)   | 12.7 (9.0-16.5)      |                                   |
| Education                                                                                                                     |                    |                      | <0.001                            |
| High school or less                                                                                                           | 31.1 (26.2-35.9)   | 53.2 (47.9-58.5)     |                                   |
| Some college or more                                                                                                          | 68.9 (64.1-73.8)   | 46.8 (41.5-52.1)     |                                   |
| Poverty to Income Ratio (family)                                                                                              |                    |                      | <0.001                            |
| ≤130%                                                                                                                         | 19.3 (15.8-22.7)   | 53.9 (49.4-58.5)     |                                   |
| >130%                                                                                                                         | 80.7 (77.3-84.2)   | 46.1 (41.5-50.6)     |                                   |
| Marital Status                                                                                                                |                    |                      | <0.001                            |
| Married                                                                                                                       | 57.6 (53.8-61.5)   | 40.2 (34.7-45.6)     |                                   |
| Not married                                                                                                                   | 42.4 (38.5-46.2)   | 59.8 (54.4-65.3)     |                                   |

<sup>a</sup> Data are presented as percentage % (95% CI).

<sup>b</sup> Data are weighted to be nationally representative.

<sup>c</sup> Chi-square tests to determine statistically significant differences between food security status groups.

<sup>d</sup> Other includes race/ethnicity other than Non-Hispanic White, Non-Hispanic African American, or Hispanic, including multiracial.

**eFigure 1.** Crude Weighted Trends in Waist Circumference by Sex and Race/Ethnicity, NHANES 1999-2016<sup>a</sup>

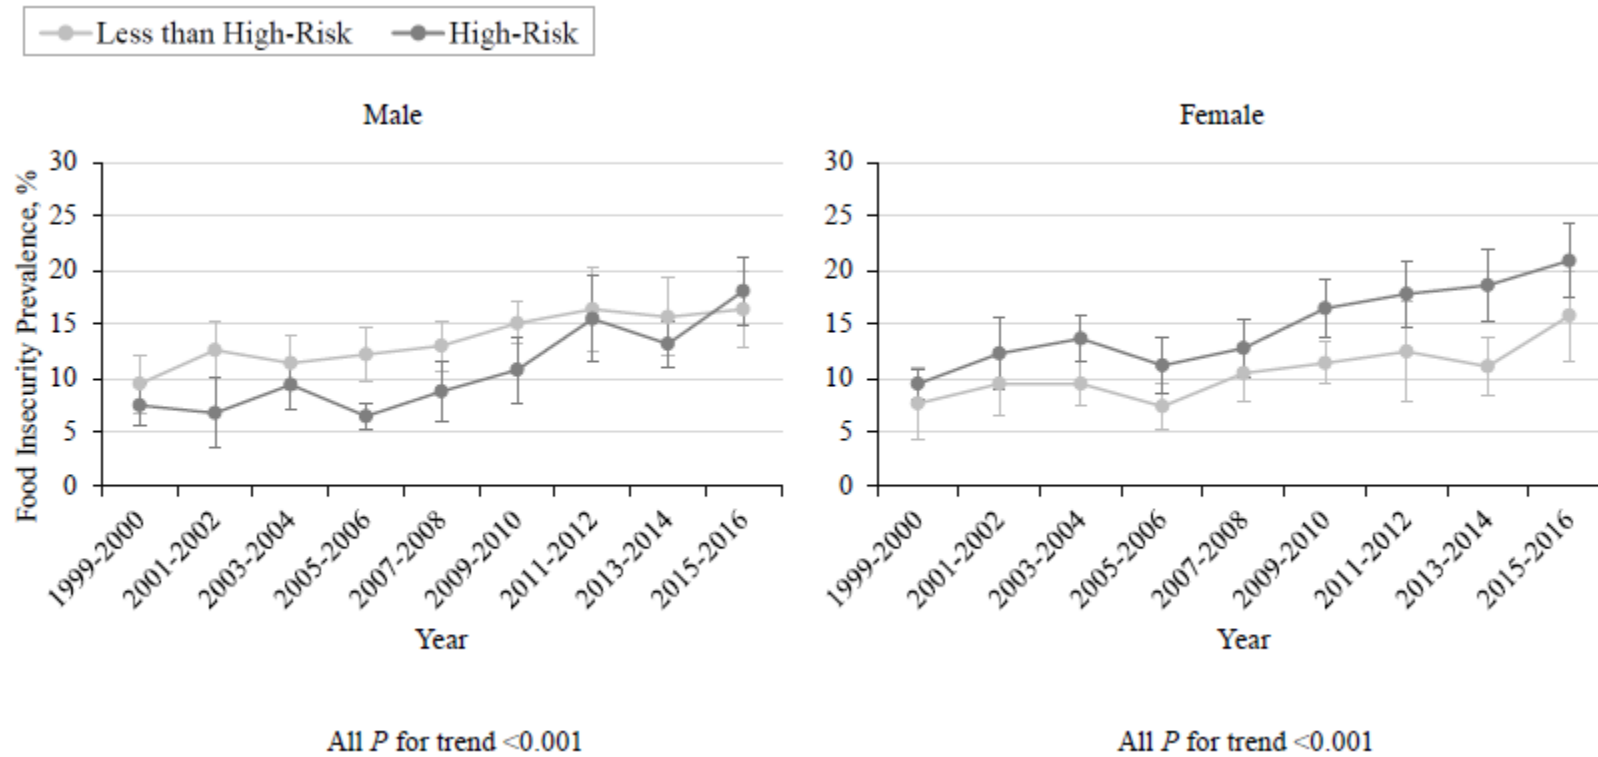

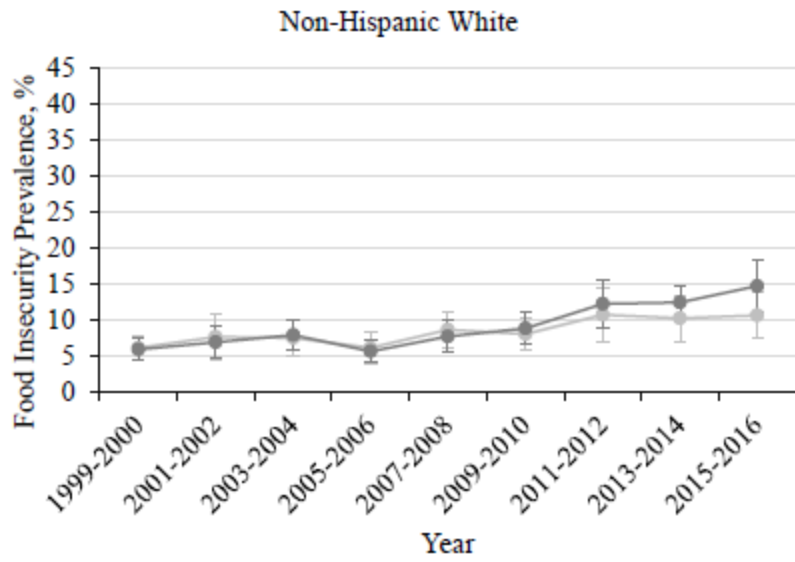

Less than High-Risk ( $P$  for trend =0.003)  
 High-Risk ( $P$  for trend <0.001)

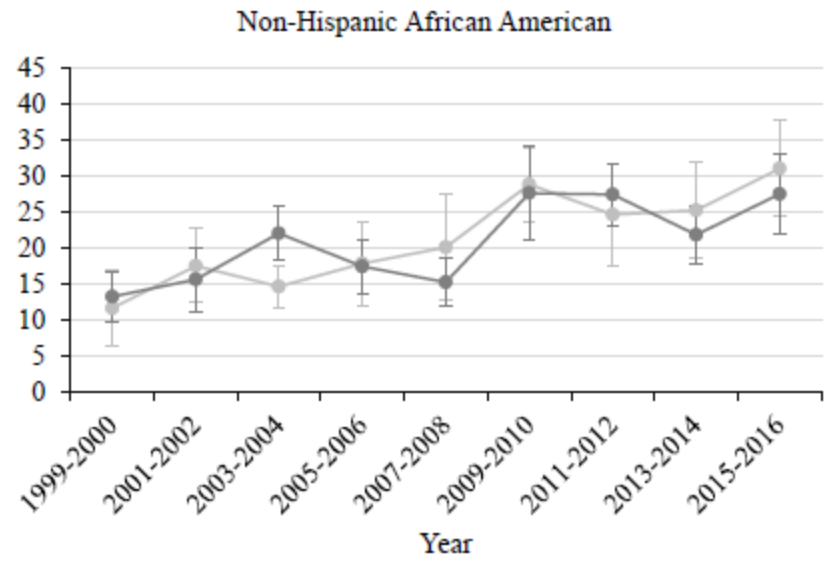

All  $P$  for trend <0.001

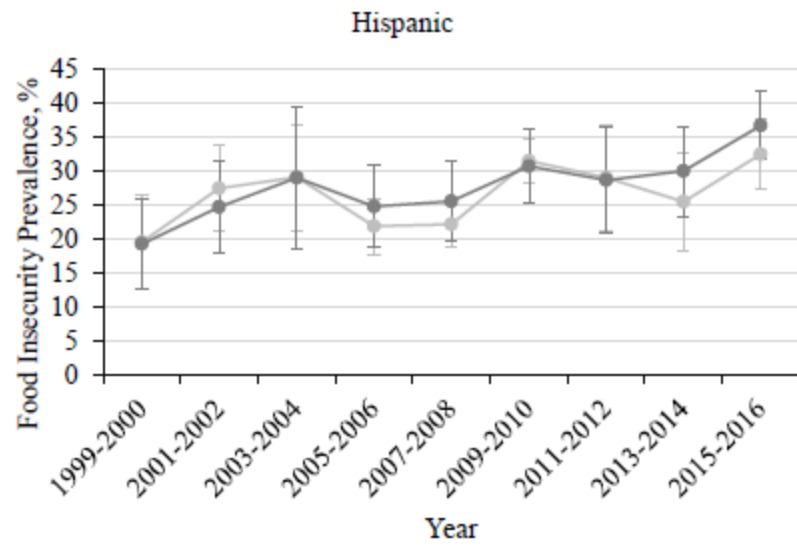

Less than High-Risk ( $P$  for trend =0.02)  
 High-Risk ( $P$  for trend <0.001)

<sup>a</sup> Data weighted to be nationally representative. Error bars indicate 95% CIs.

| <b>eTable 2. Crude Weighted Trends in Food Insecurity by Sex and Adiposity Among the US Adult Population, NHANES 1999-2016<sup>a,b</sup></b> |                      |                       |                       |                      |                       |                       |                       |                       |                     |                                |
|----------------------------------------------------------------------------------------------------------------------------------------------|----------------------|-----------------------|-----------------------|----------------------|-----------------------|-----------------------|-----------------------|-----------------------|---------------------|--------------------------------|
|                                                                                                                                              | <b>1999-2000</b>     | <b>2001-2002</b>      | <b>2003-2004</b>      | <b>2005-2006</b>     | <b>2007-2008</b>      | <b>2009-2010</b>      | <b>2011-2012</b>      | <b>2013-2014</b>      | <b>2015-2016</b>    | <b>P for Trend<sup>c</sup></b> |
| <b><i>Female</i></b>                                                                                                                         |                      |                       |                       |                      |                       |                       |                       |                       |                     |                                |
| <b>BMI</b>                                                                                                                                   |                      |                       |                       |                      |                       |                       |                       |                       |                     |                                |
| <25 kg/m <sup>2</sup>                                                                                                                        | 7.3<br>(4.7 – 9.9)   | 8.2<br>(5.8 – 10.5)   | 9.2<br>(7.0 – 11.3)   | 7.8<br>(5.1 – 10.4)  | 8.8<br>(6.2 – 11.5)   | 10.8<br>(8.5 – 13.1)  | 12.3<br>(8.2 – 16.5)  | 10.6<br>(7.3 – 13.8)  | 14.7<br>(9.9-19.4)  | <0.001                         |
| 25 to 29.9 kg/m <sup>2</sup>                                                                                                                 | 7.0<br>(4.4 – 9.7)   | 10.2<br>(6.3 - 14.1)  | 11.1<br>(7.6 – 14.7)  | 8.6<br>(5.8 – 11.5)  | 10.8<br>(8.4 – 13.3)  | 12.6<br>(9.7 – 15.5)  | 13.2<br>(9.2 – 17.2)  | 13.9<br>(9.6 – 18.2)  | 16.1<br>(11.9-20.3) | <0.001                         |
| ≥30 kg/m <sup>2</sup>                                                                                                                        | 11.8<br>(9.6 – 14.0) | 14.5<br>(10.9 – 18.0) | 16.0<br>(13.3 – 18.6) | 12.2<br>(8.8– 15.6)  | 15.6<br>(11.8 – 19.4) | 19.6<br>(15.5 – 23.6) | 21.3<br>(17.2 – 25.4) | 21.4<br>(17.4 – 25.4) | 24.6<br>(20.8-28.4) | <0.001                         |
| <b>WC</b>                                                                                                                                    |                      |                       |                       |                      |                       |                       |                       |                       |                     |                                |
| Less than High-Risk                                                                                                                          | 7.7<br>(4.4 – 11.0)  | 9.5<br>(6.6 – 12.3)   | 9.5<br>(7.4 – 11.5)   | 7.4<br>(5.2 – 9.6)   | 10.5<br>(7.9 – 13.1)  | 11.4<br>(9.5 – 13.4)  | 12.5<br>(7.9 – 17.0)  | 11.1<br>(8.3 – 13.8)  | 15.8<br>(11.6-20.0) | <0.001                         |
| High-Risk                                                                                                                                    | 9.5<br>(8.1 – 10.9)  | 12.3<br>(9.0 – 15.7)  | 13.7<br>(11.6 – 15.9) | 11.2<br>(8.6 – 13.8) | 12.8<br>(10.1 – 15.4) | 16.5<br>(13.9 – 19.2) | 17.8<br>(14.8 – 20.8) | 18.6<br>(15.3 – 21.9) | 20.9<br>(17.5-24.4) | <0.0001                        |
| <b><i>Male</i></b>                                                                                                                           |                      |                       |                       |                      |                       |                       |                       |                       |                     |                                |
| <b>BMI</b>                                                                                                                                   |                      |                       |                       |                      |                       |                       |                       |                       |                     |                                |
| <25 kg/m <sup>2</sup>                                                                                                                        | 10.4<br>(6.5 – 14.4) | 14.5<br>(9.9 – 19.1)  | 12.2<br>(8.1 – 16.3)  | 13.1<br>(9.3 – 16.9) | 14.2<br>(11.3 – 17.2) | 14.9<br>(12.4 – 17.5) | 16.1<br>(10.6 – 21.6) | 18.8<br>(13.5 – 24.1) | 15.6<br>(11.3-20.4) | 0.008                          |
| 25 to 29.9 kg/m <sup>2</sup>                                                                                                                 | 7.5<br>(5.2 – 9.8)   | 9.3<br>(7.4 - 11.3)   | 8.8<br>(6.1 – 11.5)   | 9.3<br>(7.2 – 11.5)  | 10.1<br>(7.6 – 12.6)  | 13.7<br>(10.7 – 16.6) | 14.1<br>(9.9 – 18.2)  | 11.7<br>(8.6 – 14.8)  | 15.1<br>(10.8-19.5) | <0.001                         |
| ≥30 kg/m <sup>2</sup>                                                                                                                        | 8.6<br>(5.7 – 11.5)  | 7.5<br>(3.9 – 11.2)   | 11.1<br>(8.9 – 13.3)  | 7.2<br>(5.3 – 9.0)   | 10.5<br>(7.0 – 14.0)  | 11.5<br>(8.4 – 14.6)  | 17.8<br>(13.6 – 22.0) | 14.7<br>(12.5 – 16.9) | 20.2<br>(16.5-24.0) | <0.001                         |
| <b>WC</b>                                                                                                                                    |                      |                       |                       |                      |                       |                       |                       |                       |                     |                                |
| Less than High-Risk                                                                                                                          | 9.5<br>(6.8 – 12.2)  | 12.6<br>(10.0 – 15.2) | 11.4<br>(8.9 – 13.9)  | 12.2<br>(9.6 – 14.7) | 13.0<br>(10.7 – 15.3) | 15.1<br>(13.1 – 17.0) | 16.4<br>(12.5 – 20.2) | 15.7<br>(12.0 – 19.3) | 16.4<br>(12.9-20.0) | <0.001                         |
| High-Risk                                                                                                                                    | 7.5<br>(5.5 – 9.4)   | 6.8<br>(3.5 – 10.0)   | 9.4<br>(7.2 – 11.7)   | 6.5<br>(5.3 – 7.7)   | 8.8<br>(6.0 – 11.6)   | 10.8<br>(7.8 – 13.9)  | 15.5<br>(11.5 – 19.5) | 13.2<br>(11.1 – 15.4) | 18.1<br>(14.9-21.3) | <0.001                         |

<sup>a</sup> Data are presented as percentage % (95% CI) for each survey cycle.

<sup>b</sup> Data are weighted to be nationally representative.

<sup>c</sup> The estimate  $\beta$  (95% CI) and P for trend were calculated using logistic regression that included the NHANES 2-year cycle as a continuous variable.

| <b>eTable 3. Crude Weighted Trends in Food Insecurity by Race/Ethnicity and Adiposity Among the US Adult Population, NHANES 1999-2016<sup>a,b</sup></b> |                       |                       |                       |                       |                       |                       |                       |                       |                     |                    |
|---------------------------------------------------------------------------------------------------------------------------------------------------------|-----------------------|-----------------------|-----------------------|-----------------------|-----------------------|-----------------------|-----------------------|-----------------------|---------------------|--------------------|
|                                                                                                                                                         | <b>1999-2000</b>      | <b>2001-2002</b>      | <b>2003-2004</b>      | <b>2005-2006</b>      | <b>2007-2008</b>      | <b>2009-2010</b>      | <b>2011-2012</b>      | <b>2013-2014</b>      | <b>2015-2016</b>    | <b>P for Trend</b> |
| <b><i>Non-Hispanic White</i></b>                                                                                                                        |                       |                       |                       |                       |                       |                       |                       |                       |                     |                    |
| <b>BMI</b>                                                                                                                                              |                       |                       |                       |                       |                       |                       |                       |                       |                     |                    |
| <25 kg/m <sup>2</sup>                                                                                                                                   | 6.8<br>(3.6 – 10.0)   | 8.1<br>(4.5 – 11.7)   | 8.5<br>(5.1 – 11.9)   | 6.4<br>(4.1 – 8.8)    | 8.6<br>(5.7 – 11.5)   | 8.5<br>(6.2 – 10.9)   | 11.6<br>(6.7 – 16.5)  | 11.2<br>(7.0 – 15.4)  | 11.7<br>(7.4-15.9)  | 0.006              |
| 25 to 29.9 kg/m <sup>2</sup>                                                                                                                            | 3.9<br>(1.6 – 6.2)    | 5.3<br>(3.6 – 7.0)    | 5.7<br>(3.7 – 7.7)    | 5.3<br>(3.5 – 7.1)    | 6.9<br>(5.1 – 8.8)    | 7.5<br>(5.5 – 9.5)    | 8.7<br>(5.7 – 11.8)   | 8.6<br>(5.5 – 11.7)   | 9.6<br>(5.8-13.4)   | <0.001             |
| ≥30 kg/m <sup>2</sup>                                                                                                                                   | 7.6<br>(4.9 – 10.3)   | 8.0<br>(4.8 – 11.2)   | 9.2<br>(6.9 – 11.4)   | 5.5<br>(3.4 – 7.7)    | 8.9<br>(5.8 – 12.0)   | 9.1<br>(6.6 – 11.5)   | 14.3<br>(9.8 – 18.8)  | 14.4<br>(11.1 – 17.7) | 17.1<br>(13.0-21.1) | <0.001             |
| <b>WC</b>                                                                                                                                               |                       |                       |                       |                       |                       |                       |                       |                       |                     |                    |
| Less than High-Risk                                                                                                                                     | 6.1<br>(4.3 – 7.5)    | 7.6<br>(4.4 – 10.8)   | 7.5<br>(5.0 – 9.9)    | 6.1<br>(3.8 – 8.4)    | 8.6<br>(6.2 – 11.0)   | 8.0<br>(5.7 – 10.2)   | 10.7<br>(6.9 – 14.4)  | 10.2<br>(7.0 – 13.4)  | 10.6<br>(7.5-13.8)  | 0.003              |
| High-Risk                                                                                                                                               | 5.9<br>(4.3 – 7.5)    | 6.9<br>(4.6 – 9.1)    | 7.9<br>(5.7 – 10.1)   | 5.6<br>(4.0 – 7.1)    | 7.7<br>(5.5 – 10.0)   | 8.8<br>(6.5 – 11.1)   | 12.2<br>(8.8 – 15.5)  | 12.4<br>(10.0 – 14.8) | 14.7<br>(11.0-18.4) | <0.001             |
| <b><i>Non-Hispanic African American</i></b>                                                                                                             |                       |                       |                       |                       |                       |                       |                       |                       |                     |                    |
| <b>BMI</b>                                                                                                                                              |                       |                       |                       |                       |                       |                       |                       |                       |                     |                    |
| <25 kg/m <sup>2</sup>                                                                                                                                   | 13.3<br>(6.6 – 20.1)  | 18.0<br>(9.6 – 26.5)  | 13.5<br>(7.6 – 19.5)  | 20.8<br>(13.5 – 28.0) | 21.7<br>(13.8 – 29.7) | 31.4<br>(26.0 – 36.8) | 25.2<br>(14.7 – 35.6) | 29.6<br>(21.1 – 38.1) | 34.0<br>(24.1-43.9) | <0.001             |
| 25 to 29.9 kg/m <sup>2</sup>                                                                                                                            | 10.3<br>(5.0 – 15.6)  | 15.8<br>(11.0 - 20.7) | 16.9<br>(8.4 – 25.5)  | 15.2<br>(10.7 – 19.7) | 13.6<br>(7.6 – 19.7)  | 25.5<br>(16.6 – 34.3) | 23.9<br>(19.1 – 28.7) | 22.9<br>(17.9 – 27.9) | 27.0<br>(22.6-31.5) | <0.001             |
| ≥30 kg/m <sup>2</sup>                                                                                                                                   | 13.0<br>(9.1 – 16.9)  | 16.6<br>(11.3 – 21.9) | 21.5<br>(17.0 – 25.9) | 17.5<br>(13.1 – 21.9) | 17.8<br>(14.0– 21.6)  | 28.0<br>(21.0 – 35.0) | 28.3<br>(22.4 – 34.1) | 20.6<br>(16.6 – 24.7) | 28.3<br>(22.6-34.1) | <0.001             |
| <b>WC</b>                                                                                                                                               |                       |                       |                       |                       |                       |                       |                       |                       |                     |                    |
| Less than High-Risk                                                                                                                                     | 11.6<br>(6.3 – 16.9)  | 17.5<br>(12.3 – 22.6) | 14.6<br>(11.7 – 17.5) | 17.8<br>(12.1 – 23.6) | 20.1<br>(12.8 – 27.5) | 28.8<br>(23.6 – 34.0) | 24.6<br>(17.5 – 31.7) | 25.2<br>(18.6 – 31.8) | 31.0<br>(24.3-37.6) | <0.001             |
| High-Risk                                                                                                                                               | 13.2<br>(9.6 – 16.7)  | 15.6<br>(11.1 – 20.0) | 22.0<br>(18.3 – 25.7) | 17.4<br>(13.6 – 21.2) | 15.2<br>(11.9 – 18.5) | 27.6<br>(21.0 – 34.1) | 27.4<br>(23.2 – 31.7) | 21.8<br>(17.7 – 25.9) | 27.5<br>(21.9-33.2) | <0.001             |
| <b><i>Hispanic</i></b>                                                                                                                                  |                       |                       |                       |                       |                       |                       |                       |                       |                     |                    |
| <b>BMI</b>                                                                                                                                              |                       |                       |                       |                       |                       |                       |                       |                       |                     |                    |
| <25 kg/m <sup>2</sup>                                                                                                                                   | 18.4<br>(9.1 – 27.7)  | 26.2<br>(18.2 – 34.2) | 30.6<br>(19.8 – 41.4) | 18.4<br>(12.1 – 24.6) | 20.2<br>(12.8 – 27.6) | 25.6<br>(21.1 – 30.4) | 23.8<br>(16.6 – 30.9) | 25.2<br>(16.7 – 33.6) | 28.1<br>(23.1-33.0) | 0.34               |
| 25 to 29.9 kg/m <sup>2</sup>                                                                                                                            | 20.1<br>(13.8 – 26.3) | 29.4<br>(21.3 – 37.5) | 29.2<br>(19.1 – 39.3) | 23.6<br>(18.5 – 28.7) | 23.6<br>(19.0 – 28.2) | 30.9<br>(24.7 – 37.2) | 29.4<br>(20.3– 38.5)  | 25.0<br>(19.9 – 30.1) | 34.7<br>(27.0-42.4) | 0.06               |
| ≥30 kg/m <sup>2</sup>                                                                                                                                   | 19.1<br>(12.0 – 26.1) | 23.1<br>(14.9 – 31.2) | 27.6<br>(15.5 – 39.7) | 26.9<br>(19.9 – 33.8) | 26.8<br>(19.6 – 34.0) | 34.2<br>(28.4 – 39.9) | 30.8<br>(22.5 – 39.1) | 31.0<br>(23.4 – 38.6) | 37.6<br>(33.7-41.5) | <0.001             |
| <b>WC</b>                                                                                                                                               |                       |                       |                       |                       |                       |                       |                       |                       |                     |                    |
| Less than High-Risk                                                                                                                                     | 19.6<br>(12.8 – 26.4) | 27.5<br>(21.2 – 33.7) | 29.1<br>(21.3 – 36.9) | 21.9<br>(17.8 – 26.1) | 22.2<br>(18.9 – 25.4) | 31.5<br>(28.2 – 34.7) | 29.0<br>(21.1 – 36.9) | 25.5<br>(18.4 – 32.6) | 32.5<br>(27.3-37.7) | 0.02               |
| High-Risk                                                                                                                                               | 19.3                  | 24.7                  | 29.0                  | 24.8                  | 25.6                  | 30.7                  | 28.7                  | 30.0                  | 36.7                | <0.001             |



|  |               |               |               |               |               |               |               |               |             |  |
|--|---------------|---------------|---------------|---------------|---------------|---------------|---------------|---------------|-------------|--|
|  | (12.7 – 25.9) | (18.1 – 31.4) | (18.4 – 39.4) | (18.7 – 30.8) | (19.8 – 31.5) | (25.3 – 36.1) | (21.1 – 36.4) | (23.4 – 36.6) | (31.7-41.7) |  |
|--|---------------|---------------|---------------|---------------|---------------|---------------|---------------|---------------|-------------|--|

<sup>a</sup> Data are presented as percentage % (95% CI) for each survey cycle.

<sup>b</sup> Data are weighted to be nationally representative.

<sup>c</sup> The estimate  $\beta$  (95% CI) and P for trend were calculated using logistic regression that included the NHANES 2-year cycle as a continuous variable.

**eFigure 2.** Adjusted Odds (95% CI) of Food Insecurity Among Adults in the US, NHANES 1999-2016<sup>a</sup>

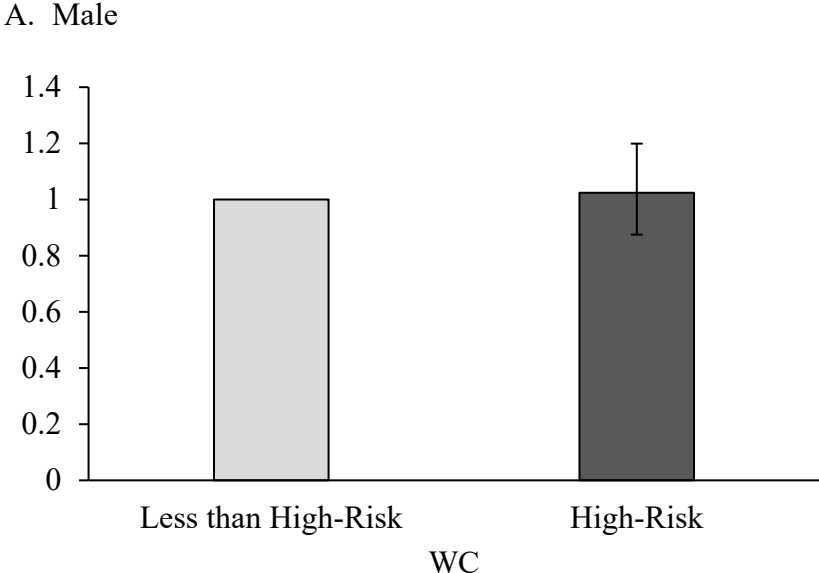

B. Female

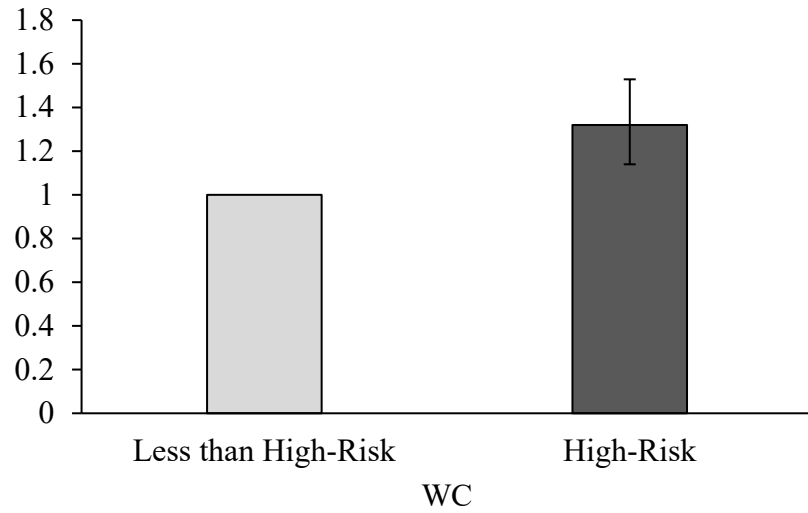

C. Non-Hispanic White

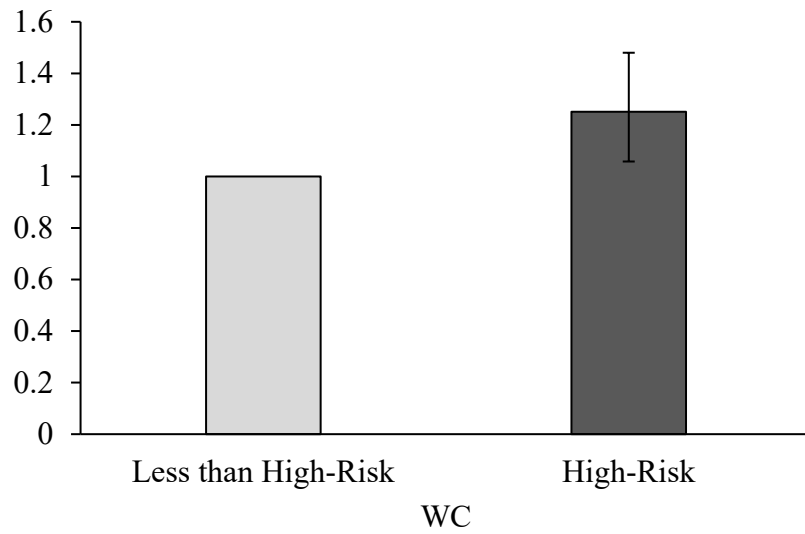

D. Non-Hispanic African American

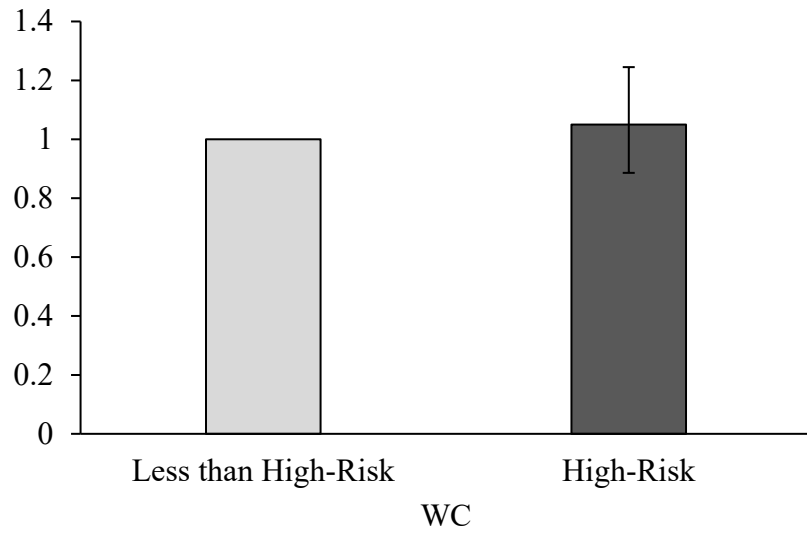

E. Hispanic

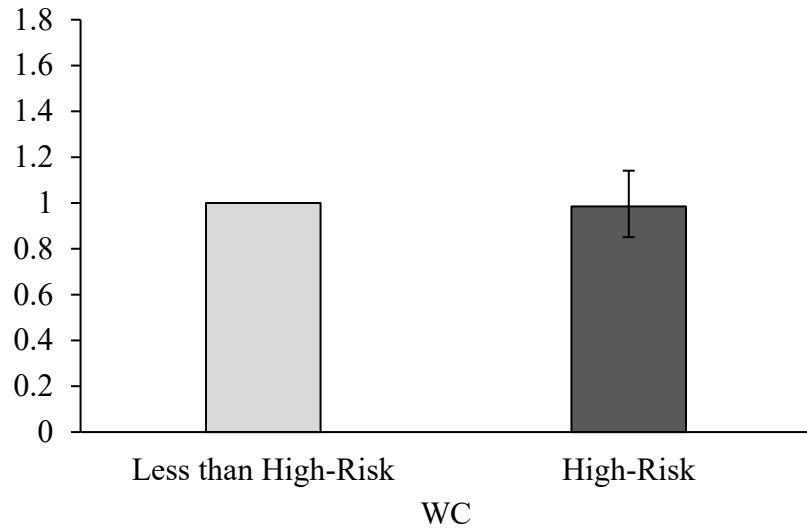

<sup>a</sup>Data weighted to be nationally representative. Error bars indicate 95% CI.

©2020 Myers CA et al. *JAMA Network Open*
